# Supplementary material
Source: publisher site journal article supplement (https://www.spandidos-publications.com/5242/downloadSupplementary)
Supplement: Supplementary file 1 [file downloadSupplementary]

Table SI. Primer sequences used for reverse transcription-quantitative PCR.

| Gene name | Primer sequence (5'→3')    |
|-----------|----------------------------|
| KIF11     | F: TCCCTTGGCTGGTATAATTCCA  |
|           | R: GTTACGGGGATCATCAAACATCT |
| GAPDH     | F: CAGGAGGCATTGCTGATGAT    |
|           | R: GAAGGCTGGGGCTCATT       |

F, forward; R, reverse.

Table SII. The sequences of si-KIF11 and si-CyclinB1 used for transient transfections of non-small cell lung cancer cells.

| Primer name    | Primer sequence (5'→3') |
|----------------|-------------------------|
| si-KIF11-1     | GAACTTGAAACCACTCAA      |
| si-KIF11-2     | AAAGCTAGCGCCCATTCAA     |
| si-KIF11-3     | CCAAACTGGATCGTAAGAA     |
| si-CyclinB1-1  | GTGTCAGGCTTTCTCTGAT     |
| si- CyclinB1-2 | GGTGCACTTTCCTCCTTCT     |
| si- CyclinB1-3 | CACCAACTCTACAACATTA     |

si, small interfering; KIF11, kinesin family member 11.

Table SIII. The correlations among KIF11, CDK1 and CyclinB1 genes in 15 nearest neighbors based on tissue RNA-seq expression.

| Selected genes | Neighboring genes | Correlation | Cluster |
|----------------|-------------------|-------------|---------|
| KIF11          | CyclinB1          | 0.9789      | 53      |
| CDK1           | KIF11             | 0.9737      | 53      |
| CyclinB1       | CDK1              | 0.9614      | 53      |

Correlation between the selected gene and neighboring gene. Correlation is calculated as Spearman correlation in PCA space based on the RNA-seq expression data. KIF11, kinesin family member 11.
